# Supplementary material for: The impact of governance in primary health care delivery: a systems thinking approach with a European panel
Source: PubMed Central journal article supplement (PMC6609383; doi:10.1186/s12961-019-0456-8), 2019-07-04
Supplement: 12961_2019_456_MOESM1_ESM.pdf [file 12961_2019_456_MOESM1_ESM.pdf]

# The impact of governance in primary health care delivery: a systems thinking approach with a European panel

Authors: Ana Belén Espinosa-González, Brendan C Delaney, Joachim Marti, Ara Darzi

## Additional file 1. List of variables and categories used in the study

Table 1 List of PHC variables included

| <b>PHC supply and demand side variables</b>              |                                                                                                                                                                                                                                                                                                                                                          |
|----------------------------------------------------------|----------------------------------------------------------------------------------------------------------------------------------------------------------------------------------------------------------------------------------------------------------------------------------------------------------------------------------------------------------|
| <b>Round 1</b>                                           |                                                                                                                                                                                                                                                                                                                                                          |
| <b>Variable</b>                                          | <b>Categories</b>                                                                                                                                                                                                                                                                                                                                        |
| Providers' employment status                             | Civil servant/public employee<br>Salaried or employed by other self-employed PHC physicians or PHC practice<br>Self-employed<br>Others                                                                                                                                                                                                                   |
| Type of contract when is self-employed                   | Contracted to the national health authority<br>Contracted to local or regional health authority<br>Contracted to social health insurance (SHI) (single fund)<br>Contracted to SHI funds<br>Contracted to one or several private health insurance(s) (PHI)<br>Self-employed without contracts<br>Others                                                   |
| Providers' type of payments                              | Fixed salary<br>Mix of payment per performance or results +- capitation /basic payments<br>Fee for service (FFS)<br>Directly paid out-of-pocket (OOP)<br>Others                                                                                                                                                                                          |
| Type of mix of payment when selected                     | Mainly capitation and additional payment per performance/results (which one?)<br>Mainly payment per performance/results and additional payment per capitation (which?)<br>Balanced mix of payment per performance/results and capitation (which?)                                                                                                        |
| If fee for service, who pays the fee?                    | Paid by national health insurance fund<br>Paid by SHI fund<br>Paid by PHI<br>Others                                                                                                                                                                                                                                                                      |
| Ownership                                                | Free text                                                                                                                                                                                                                                                                                                                                                |
| Compulsory training programme for GPs                    | No/ Yes (duration)                                                                                                                                                                                                                                                                                                                                       |
| Institution that issues professional license to practice | Free text                                                                                                                                                                                                                                                                                                                                                |
| Providers' clinical practice regulation                  | The organisation they work for<br>The central organisation in charge of purchasing PHC services centrally<br>The local or regional organisation delegated to pay PHC services in that region<br>An independent inspection authority<br>The same institution that collects funds to finance PHC services<br>There is no institution monitoring<br>Others  |
| Providers' competence regulation                         | The college of GPs/physicians<br>Another professional body (which one)<br>The same institution providing the license to practice<br>Their employer/ institution they have a contract with<br>Independent governmental body<br>The central/local health authority/ Ministry of Health (Mohr)<br>There is no institution in charge of monitoring<br>Others |
| Providers' guidelines                                    | Yes/ no<br>Professional associations<br>Mohs/regional health authority<br>Pharmaceutical bodies<br>The same institution they are contracted to<br>The institution that holds physicians accountable for their clinical practice<br>An independent authority<br>Others                                                                                    |
| Gatekeeping                                              | Yes/ Incentivised/ No                                                                                                                                                                                                                                                                                                                                    |

|                                                                             |                                                                                                                                                                                                                                                                                                                                                                                                                                                                                                                                                                                                                                                                                                                                                                                                                                                                                                                                                                                                    |
|-----------------------------------------------------------------------------|----------------------------------------------------------------------------------------------------------------------------------------------------------------------------------------------------------------------------------------------------------------------------------------------------------------------------------------------------------------------------------------------------------------------------------------------------------------------------------------------------------------------------------------------------------------------------------------------------------------------------------------------------------------------------------------------------------------------------------------------------------------------------------------------------------------------------------------------------------------------------------------------------------------------------------------------------------------------------------------------------|
| Type of PHC practice                                                        | Single-handed PHC practice (with/without nurse)<br>Multiple-handed practice (with/without nurse)<br>Multiple handed practice with nurse working as fully integrated team (number physician=nurse)<br>Any option above plus other specialists<br>Others                                                                                                                                                                                                                                                                                                                                                                                                                                                                                                                                                                                                                                                                                                                                             |
| Pick and rank the most common type of patients seen in PHC practices        | Covered under general taxation funding<br>Covered under SHI fund(s)<br>Entitled to public PHC due to low income<br>Private patient without insurance<br>Covered under PHI<br>Others                                                                                                                                                                                                                                                                                                                                                                                                                                                                                                                                                                                                                                                                                                                                                                                                                |
| Co-payments                                                                 | Yes/ Only prescriptions, diagnostic tests / No                                                                                                                                                                                                                                                                                                                                                                                                                                                                                                                                                                                                                                                                                                                                                                                                                                                                                                                                                     |
| Provider's workload drivers                                                 | Clinical practice/patients' visits<br>Skills and competence maintenance activities<br>Bureaucratic clinical tasks<br>Bureaucratic management tasks<br>Others                                                                                                                                                                                                                                                                                                                                                                                                                                                                                                                                                                                                                                                                                                                                                                                                                                       |
| Reasons for prescribing outside the guidelines                              | Patients' pressure<br>Lack of knowledge/insufficient training<br>Lack of standardised guidelines<br>PHI requirements<br>Pharmaceutical companies' representatives<br>Local/regional/national authority constraints                                                                                                                                                                                                                                                                                                                                                                                                                                                                                                                                                                                                                                                                                                                                                                                 |
| <b>Round 2</b>                                                              |                                                                                                                                                                                                                                                                                                                                                                                                                                                                                                                                                                                                                                                                                                                                                                                                                                                                                                                                                                                                    |
| <b>Variable</b>                                                             | <b>Categories</b>                                                                                                                                                                                                                                                                                                                                                                                                                                                                                                                                                                                                                                                                                                                                                                                                                                                                                                                                                                                  |
| Health system financing mechanism                                           | National health system (NHS) (fund raised through a percentage of the general taxation collected from nation-wide citizens)<br>Compulsory national health insurance (CNHI) (fund raised through earmarked health care contributions collected from nation-wide citizens)<br>SHI managed with a single fund (raised through earmarked health care contributions collected from the workforce)<br>SHI managed through several funds (raised through earmarked health care contributions collected from the workforce into different funds according to professional types)<br>Voluntary national health insurance (fund raised from earmarked health care contributions gathered from citizens on voluntary basis)<br>Private health insurance (PHI) (funds raised through earmarked health care contributions gathered from individuals on voluntary basis into different funds according to insurer)<br>Individual out of pocket expenditure (no insurance model, each one pays what they consume) |
| PHC practice ownership                                                      | Government (national, regional or local) owns and manages facilities<br>Government (national, regional or local) owns facilities but public employees manage them<br>Government owns the facilities, but they are rented and managed by self-employed PHC physicians/professionals<br>Government owns the facilities, but they are rented and managed by private non-professional actors<br>Single or group of PHC physicians own and manage the facilities<br>Private (non-professional) actors own and manage the facilities<br>Others                                                                                                                                                                                                                                                                                                                                                                                                                                                           |
| Institution regulating providers' competences/skills maintenance regulation | Government regulation<br>Government-professional network regulation<br>Professional regulation<br>Private actors' regulation<br>No competences/skills maintenance regulation<br>Others                                                                                                                                                                                                                                                                                                                                                                                                                                                                                                                                                                                                                                                                                                                                                                                                             |
| Institution regulating providers' clinical practice regulation              | Government regulation<br>Government- professional network regulation<br>Professional regulation<br>Private actors' regulation<br>No clinical practice regulation<br>Others                                                                                                                                                                                                                                                                                                                                                                                                                                                                                                                                                                                                                                                                                                                                                                                                                         |
| Institution regulating providers' clinical practice regulation              | Government regulation<br>Government-professional network regulation<br>Professional regulation<br>Private actors' regulation<br>No regulation of license conferral/no license required<br>Others                                                                                                                                                                                                                                                                                                                                                                                                                                                                                                                                                                                                                                                                                                                                                                                                   |
