# Supplementary material for: The impact of governance in primary health care delivery: a systems thinking approach with a European panel
Source: PubMed Central journal article supplement (PMC6609383; doi:10.1186/s12961-019-0456-8), 2019-07-04
Supplement: 12961_2019_456_MOESM3_ESM.pdf [file 12961_2019_456_MOESM3_ESM.pdf]

# The impact of governance in primary health care delivery: a systems thinking approach with a European panel

Authors: Ana Belén Espinosa-González, Brendan C Delaney, Joachim Marti, Ara Darzi

## Additional file 3. Correlations between PHC characteristics of Delphi panel countries

Table 1 Correlations table

|            |            | FM      | FFM     | MES    | ES     | ESS    | PC     | PCS    | PM     | MPM    | PMS    | O      | OS     | G      | CR     | CPR    | LC     | C       | E      |
|------------|------------|---------|---------|--------|--------|--------|--------|--------|--------|--------|--------|--------|--------|--------|--------|--------|--------|---------|--------|
| <b>FM</b>  | <b>PC</b>  | 1       | 0.706** | 0.303  | -0.293 | .410*  | -0.303 | 0.103  | -0.260 | 0.254  | 0.251  | .528** | .592** | 0.314  | 0.341  | .519** | .493*  | 0.010   | 0.309  |
|            | <b>Sig</b> |         | 0.000   | 0.150  | 0.164  | 0.047  | 0.150  | 0.632  | 0.221  | 0.232  | 0.237  | 0.008  | 0.002  | 0.136  | 0.103  | 0.009  | 0.014  | 0.962   | 0.141  |
| <b>FFM</b> | <b>PC</b>  | 0.706** | 1       | 0.208  | -0.117 | 0.277  | -0.250 | 0.120  | -0.197 | 0.280  | 0.197  | 0.312  | 0.161  | .408*  | 0.302  | .421*  | 0.237  | -0.073  | 0.125  |
|            | <b>Sig</b> | 0.000   |         | 0.331  | 0.587  | 0.189  | 0.239  | 0.577  | 0.357  | 0.185  | 0.355  | 0.138  | 0.452  | 0.048  | 0.152  | 0.040  | 0.266  | 0.734   | 0.561  |
| <b>MES</b> | <b>PC</b>  | 0.303   | 0.208   | 1      | -0.160 | .671** | .471*  | 0.290  | 0.057  | .414*  | 0.150  | .591** | .429*  | .494*  | 0.076  | 0.099  | 0.270  | -0.167  | -0.216 |
|            | <b>Sig</b> | 0.150   | 0.331   |        | 0.456  | 0.000  | 0.020  | 0.169  | 0.792  | 0.045  | 0.484  | 0.002  | 0.036  | 0.014  | 0.722  | 0.644  | 0.202  | 0.436   | 0.311  |
| <b>ES</b>  | <b>PC</b>  | -0.293  | -0.117  | -0.160 | 1      | -0.084 | -0.097 | 0.187  | 0.071  | -0.047 | -0.287 | -0.307 | -0.207 | -0.019 | -0.206 | -0.160 | -0.228 | -.582** | -0.102 |
|            | <b>Sig</b> | 0.164   | 0.587   | 0.456  |        | 0.696  | 0.651  | 0.381  | 0.741  | 0.829  | 0.174  | 0.144  | 0.332  | 0.928  | 0.333  | 0.454  | 0.285  | 0.003   | 0.636  |
| <b>ESS</b> | <b>PC</b>  | .410*   | 0.277   | .671** | -0.084 | 1      | 0.071  | 0.287  | -0.224 | .407*  | 0.164  | .594** | .447*  | 0.364  | 0.000  | 0.068  | 0.213  | -0.142  | -0.060 |
|            | <b>Sig</b> | 0.047   | 0.189   | 0.000  | 0.696  |        | 0.741  | 0.174  | 0.293  | 0.049  | 0.443  | 0.002  | 0.029  | 0.080  | 1.000  | 0.751  | 0.317  | 0.508   | 0.782  |
| <b>PC</b>  | <b>PC</b>  | -0.303  | -0.250  | .471*  | -0.097 | 0.071  | 1      | .525** | .437*  | .438*  | 0.359  | 0.192  | 0.046  | 0.073  | -0.140 | -0.310 | -0.230 | 0.159   | -.466* |
|            | <b>Sig</b> | 0.150   | 0.239   | 0.020  | 0.651  | 0.741  |        | 0.008  | 0.033  | 0.032  | 0.085  | 0.368  | 0.831  | 0.736  | 0.515  | 0.140  | 0.280  | 0.458   | 0.022  |
| <b>PCS</b> | <b>PC</b>  | 0.103   | 0.120   | 0.290  | 0.187  | 0.287  | .525** | 1      | 0.371  | .744** | 0.402  | .465*  | 0.367  | 0.157  | 0.144  | 0.238  | -0.205 | -0.009  | -0.335 |
|            | <b>Sig</b> | 0.632   | 0.577   | 0.169  | 0.381  | 0.174  | 0.008  |        | 0.074  | 0.000  | 0.052  | 0.022  | 0.078  | 0.463  | 0.501  | 0.262  | 0.336  | 0.968   | 0.109  |
| <b>PM</b>  | <b>PC</b>  | -0.260  | -0.197  | 0.057  | 0.071  | -0.224 | .437*  | 0.371  | 1      | 0.289  | .471*  | -0.017 | 0.168  | -0.084 | -0.034 | 0.008  | -0.335 | 0.038   | -0.019 |
|            | <b>Sig</b> | 0.221   | 0.357   | 0.792  | 0.741  | 0.293  | 0.033  | 0.074  |        | 0.171  | 0.020  | 0.938  | 0.432  | 0.695  | 0.876  | 0.972  | 0.110  | 0.859   | 0.928  |
| <b>MPM</b> | <b>PC</b>  | 0.254   | 0.280   | .414*  | -0.047 | .407*  | .438*  | .744** | 0.289  | 1      | .465*  | .538** | 0.292  | 0.287  | 0.055  | 0.187  | -0.054 | 0.066   | -0.175 |
|            | <b>Sig</b> | 0.232   | 0.185   | 0.045  | 0.829  | 0.049  | 0.032  | 0.000  | 0.171  |        | 0.022  | 0.007  | 0.166  | 0.174  | 0.800  | 0.382  | 0.804  | 0.758   | 0.414  |
| <b>PMS</b> | <b>PC</b>  | 0.251   | 0.197   | 0.150  | -0.287 | 0.164  | 0.359  | 0.402  | .471*  | .465*  | 1      | 0.331  | 0.350  | -0.098 | 0.218  | 0.221  | -0.064 | 0.397   | -0.123 |
|            | <b>Sig</b> | 0.237   | 0.355   | 0.484  | 0.174  | 0.443  | 0.085  | 0.052  | 0.020  | 0.022  |        | 0.114  | 0.094  | 0.648  | 0.306  | 0.300  | 0.766  | 0.055   | 0.567  |
| <b>O</b>   | <b>PC</b>  | .528**  | 0.312   | .591** | -0.307 | .594** | 0.192  | .465*  | -0.017 | .538** | 0.331  | 1      | .797** | 0.336  | .481*  | .418*  | 0.250  | -0.064  | -0.129 |
|            | <b>Sig</b> | 0.008   | 0.138   | 0.002  | 0.144  | 0.002  | 0.368  | 0.022  | 0.938  | 0.007  | 0.114  |        | 0.000  | 0.108  | 0.017  | 0.042  | 0.238  | 0.766   | 0.547  |

|            |            |        |        |        |         |        |        |        |        |        |        |        |        |        |        |        |        |        |        |
|------------|------------|--------|--------|--------|---------|--------|--------|--------|--------|--------|--------|--------|--------|--------|--------|--------|--------|--------|--------|
| <b>OS</b>  | <b>PC</b>  | .592** | 0.161  | .429*  | -0.207  | .447*  | 0.046  | 0.367  | 0.168  | 0.292  | 0.350  | .797** | 1      | 0.161  | .468*  | .412*  | 0.288  | -0.162 | 0.141  |
|            | <b>Sig</b> | 0.002  | 0.452  | 0.036  | 0.332   | 0.029  | 0.831  | 0.078  | 0.432  | 0.166  | 0.094  | 0.000  |        | 0.454  | 0.021  | 0.045  | 0.172  | 0.449  | 0.512  |
| <b>G</b>   | <b>PC</b>  | 0.314  | .408*  | .494*  | -0.019  | 0.364  | 0.073  | 0.157  | -0.084 | 0.287  | -0.098 | 0.336  | 0.161  | 1      | 0.150  | 0.137  | -0.147 | 0.036  | -0.006 |
|            | <b>Sig</b> | 0.136  | 0.048  | 0.014  | 0.928   | 0.080  | 0.736  | 0.463  | 0.695  | 0.174  | 0.648  | 0.108  | 0.454  |        | 0.484  | 0.522  | 0.492  | 0.866  | 0.979  |
| <b>CR</b>  | <b>PC</b>  | 0.341  | 0.302  | 0.076  | -0.206  | 0.000  | -0.140 | 0.144  | -0.034 | 0.055  | 0.218  | .481*  | .468*  | 0.150  | 1      | .771** | 0.294  | -0.061 | 0.038  |
|            | <b>Sig</b> | 0.103  | 0.152  | 0.722  | 0.333   | 1.000  | 0.515  | 0.501  | 0.876  | 0.800  | 0.306  | 0.017  | 0.021  | 0.484  |        | 0.000  | 0.163  | 0.778  | 0.861  |
| <b>CPR</b> | <b>PC</b>  | .519** | .421*  | 0.099  | -0.160  | 0.068  | -0.310 | 0.238  | 0.008  | 0.187  | 0.221  | .418*  | .412*  | 0.137  | .771** | 1      | .463*  | -0.012 | -0.002 |
|            | <b>Sig</b> | 0.009  | 0.040  | 0.644  | 0.454   | 0.751  | 0.140  | 0.262  | 0.972  | 0.382  | 0.300  | 0.042  | 0.045  | 0.522  | 0.000  |        | 0.023  | 0.957  | 0.993  |
| <b>LC</b>  | <b>PC</b>  | 0.493* | 0.237  | 0.270  | -0.228  | 0.213  | -0.230 | -0.205 | -0.335 | -0.054 | -0.064 | 0.250  | 0.288  | -0.147 | 0.294  | .463*  | 1      | -0.238 | 0.273  |
|            | <b>Sig</b> | 0.014  | 0.266  | 0.202  | 0.285   | 0.317  | 0.280  | 0.336  | 0.110  | 0.804  | 0.766  | 0.238  | 0.172  | 0.492  | 0.163  | 0.023  |        | 0.263  | 0.197  |
| <b>C</b>   | <b>PC</b>  | 0.010  | -0.073 | -0.167 | -.582** | -0.142 | 0.159  | -0.009 | 0.038  | 0.066  | 0.397  | -0.064 | -0.162 | 0.036  | -0.061 | -0.012 | -0.238 | 1      | -0.091 |
|            | <b>Sig</b> | 0.962  | 0.734  | 0.436  | 0.003   | 0.508  | 0.458  | 0.968  | 0.859  | 0.758  | 0.055  | 0.766  | 0.449  | 0.866  | 0.778  | 0.957  | 0.263  |        | 0.672  |
| <b>E</b>   | <b>PC</b>  | 0.309  | 0.125  | -0.216 | -0.102  | -0.060 | -.466* | -0.335 | -0.019 | -0.175 | -0.123 | -0.129 | 0.141  | -0.006 | 0.038  | -0.002 | 0.273  | -0.091 | 1      |
|            | <b>Sig</b> | 0.141  | 0.561  | 0.311  | 0.636   | 0.782  | 0.022  | 0.109  | 0.928  | 0.414  | 0.567  | 0.547  | 0.512  | 0.979  | 0.861  | 0.993  | 0.197  | 0.672  |        |

\*\* . Pearson Correlation (PC) is significant (sig.) at the 0.01 level (2-tailed)

\* . Pearson Correlation is significant at the 0.05 level (2-tailed)

Legend. FM: health system financing, FFM: fragmentation of financing mechanism, MES: main employment status, ES: type of employment status (aggregated), ESS: type of employment status (aggregated, simplified), PC: physician contract, PCS: physician contract simplified, PM: type of payment mechanisms (aggregated), MPM: main payment mechanism, PMS: type of payment mechanisms (aggregated, simplified), O: ownership, OS: ownership simplified, G: gatekeeping, CR: institution regulating physicians' competences, CPR: institution regulating physicians' clinical practice, LC: institution conferring license to practice, C: co-payments, E: patients' entitlements
